# Supplementary material
Source: PubMed Central journal article supplement (PMC1622883)
Supplement: pnas_0600816103_14.pdf [file pnas_0600816103_14.pdf]

**Table 2. Sensitivity of prior estimates of  $R_0$  (with 95% CI) to the median posterior value of  $R_0$  (with 95% CI).**

| Estimate                       | Prior            | Posterior         |
|--------------------------------|------------------|-------------------|
| <i>Original</i> – New World    | 4 (0.7, 23.7)    | 7.1 (5.0, 15.3)   |
| Old World                      |                  | 17.5 (5.9, 59.5)  |
| <i>Optimistic</i> – New World  | 1.8 (0.13, 24.2) | 7.1 (5.3, 12.2)   |
| Old World                      |                  | 26.9 (9.5, 88.4)  |
| <i>Grave</i> – New World       | 15.4 (9.4, 25.1) | 12.1 (7.5, 21.7)  |
| Old World                      |                  | 18.6 (11.7, 29.2) |
| <i>Pessimistic</i> – New World | 7 (1.9, 26.3)    | 6.9 (5.3, 12.8)   |
| Old World                      |                  | 19.2 (7.7, 45.5)  |
