# Supplementary material
Source: PubMed Central journal article supplement (PMC1622883)
Supplement: pnas_0600816103_15.pdf [file pnas_0600816103_15.pdf]

## The Sources of the Epidemic Data

**Table 3. List of epidemics used in the smallpox outbreak models**

| Epidemic                       | Year | Population Size | Ref. |
|--------------------------------|------|-----------------|------|
| Boston                         | 1721 | 10,565          | 1    |
| Burford                        | 1758 | 1,520           | 2    |
| Chester                        | 1774 | 12,009          | 1    |
| Warrington                     | 1773 | 7,000           | 1    |
| Mauritius                      | 1891 | 37,110          | 3    |
| Saint Lawrence                 | 1781 | 215             | 4*   |
| Santo Domingo, New Mexico      | 1781 | 578             | 4*   |
| Santa Clara                    | 1780 | 627             | 4*   |
| San Buenaventura               | 1780 | 501             | 4*   |
| San Francisco Xavier           | 1780 | 261             | 4*   |
| Rosalia                        | 1781 | 133             | 4*   |
| Pojoaque                       | 1781 | 270             | 4*   |
| Santo Domingo, Baja California | 1781 | 119             | 4*   |

\* Population sizes of initially susceptible individuals derived from the census of 1777 (5) and 1778 (6). Forecasting of population size up to the time of the epidemic was carried out using background birth and death rates from various sources (6–9).

## References

1. Creighton, C. (1891) *A History of Epidemics in Britain* (Cambridge Univ. Press, Cambridge, UK), Vol 2.
2. Moody, J. (1997) *The Great Burford Small-Pox Outbreak* (HindSight of Burford, Oxfordshire, UK).
3. Anderson, D. E. (1918) *The Epidemics of Mauritius* (Lewis, London).
4. Fenn, E. A. (1999), Dissertation, (Yale University, New Haven, CT).
5. Adams, E. B. & Chavez, F. A. (1956) *The Missions of New Mexico, 1776: A Description by Fray Francisco Atanasio Dominguez with Other Contemporary Documents* (University of New Mexico Press, Albuquerque).
6. Archivo General de Indias, Sección Indiferente General (1778) *Padrones de Cusiguriáchic* (Archivo General de Indias, Sección Indiferente General, Cusiguriáchic, Mexico).
7. Jackson, R. H. (1983) *J. Calif. Great Basin Anthropol.* **5**, 131–139.
8. Jackson, R. H. (1981) *J. Calif. Great Basin Anthropol.* **3**, 138–143.
9. Jackson, R.H. (1994) *Indian Population Decline: The Missions of Northwestern New Spain, 1687-1840* (University of New Mexico Press, Albuquerque).
