# Supplementary material
Source: PubMed Central journal article supplement (PMC1622883)

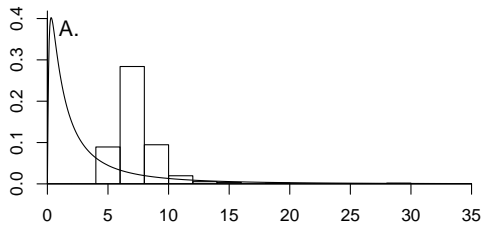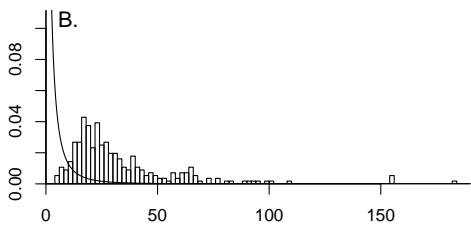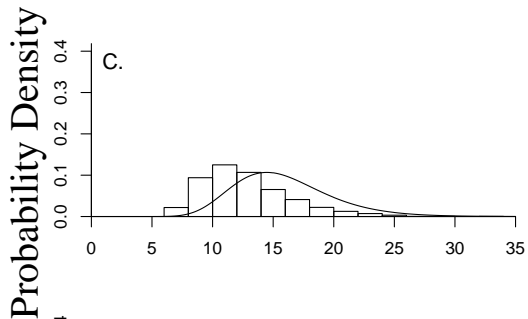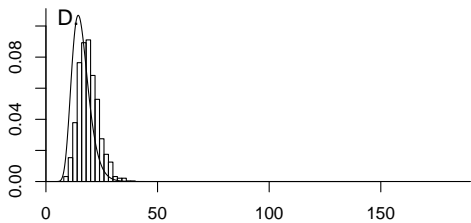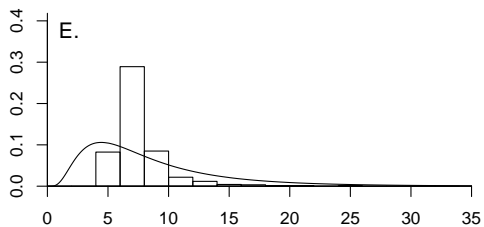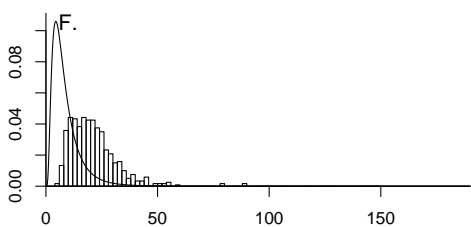

$R_0$

Supplement: pnas_0600816103_1.pdf [file pnas_0600816103_1.pdf]

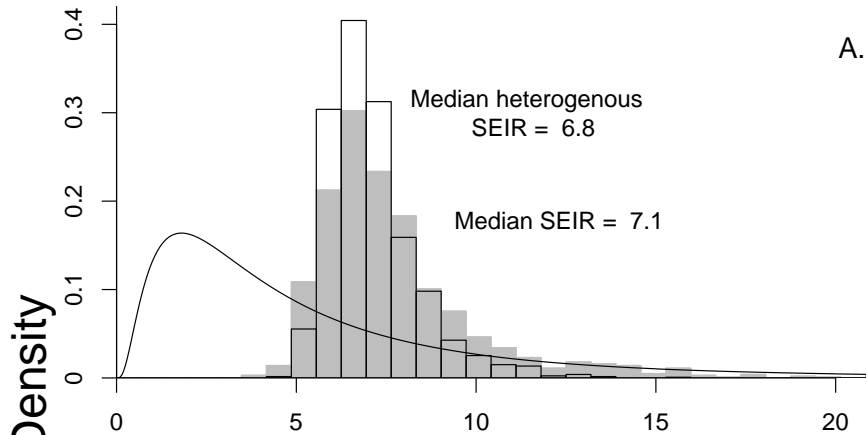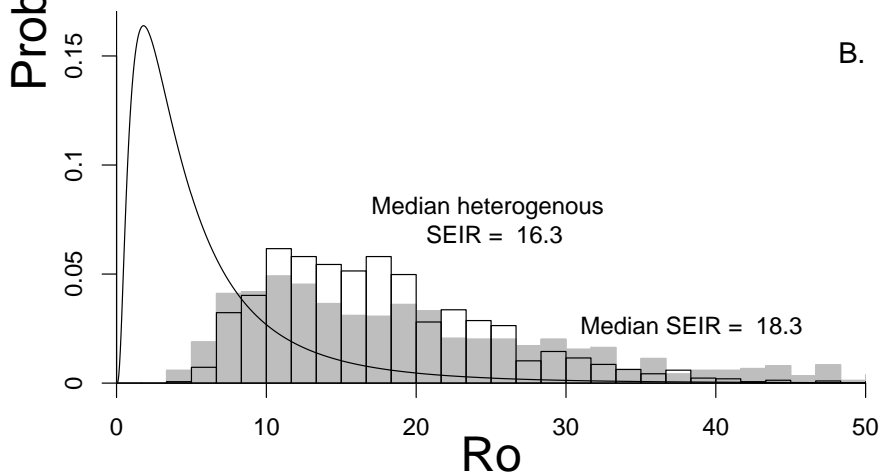

Supplement: pnas_0600816103_10.pdf [file pnas_0600816103_10.pdf]

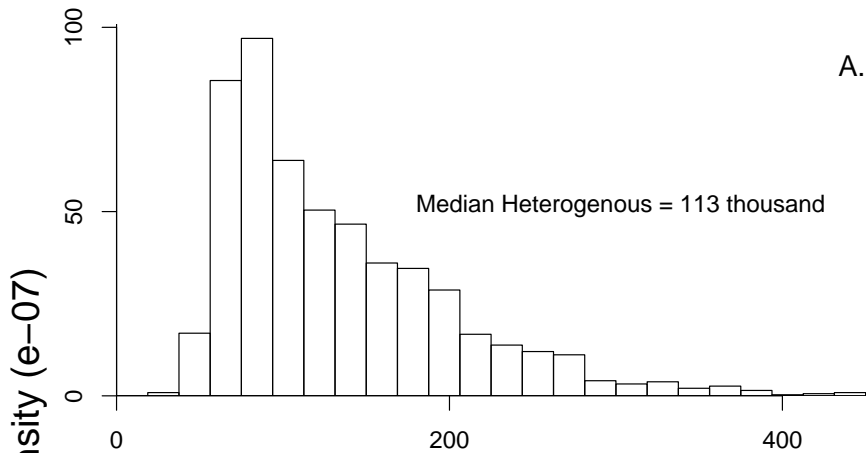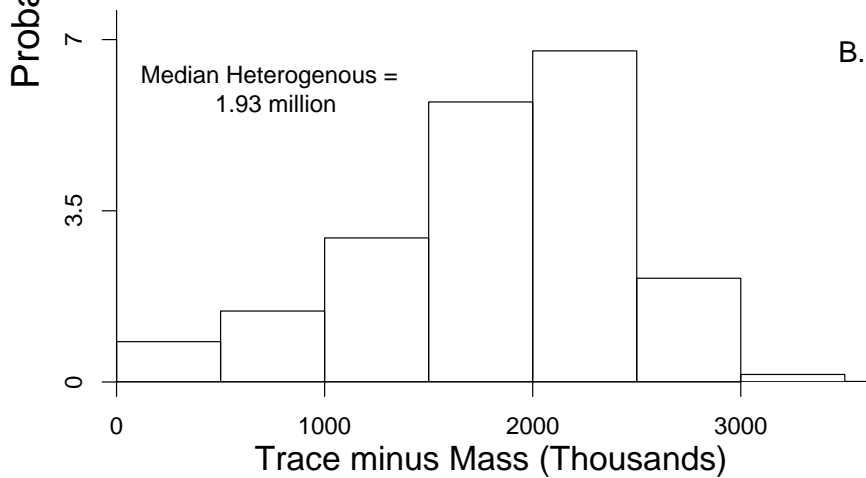

Supplement: pnas_0600816103_11.pdf [file pnas_0600816103_11.pdf]

A.

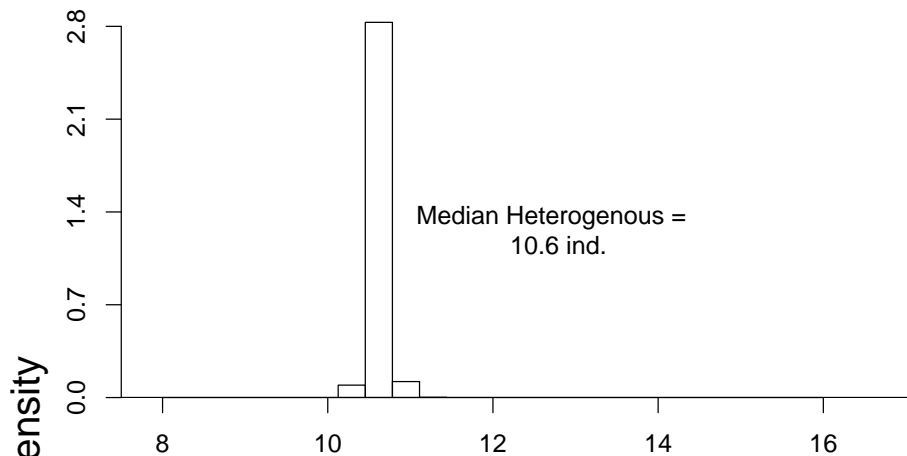

B.

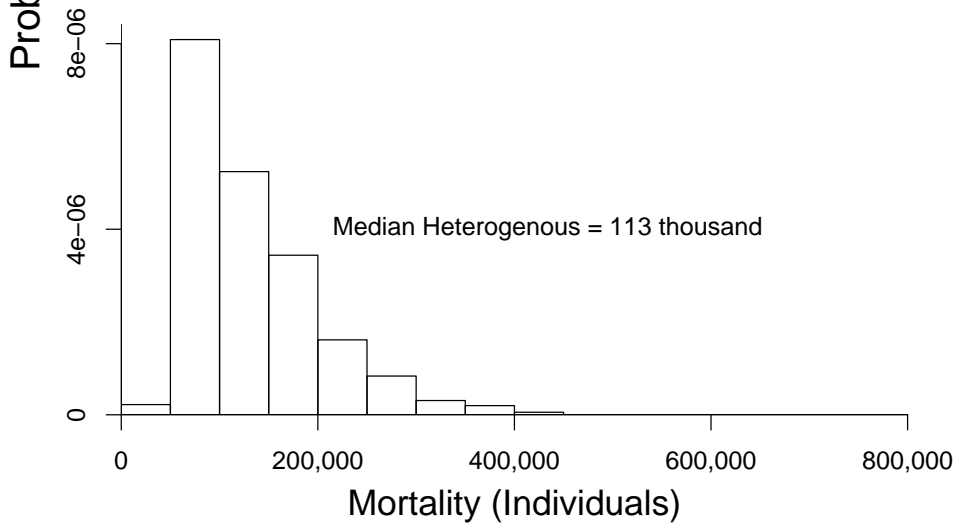

Supplement: pnas_0600816103_12.pdf [file pnas_0600816103_12.pdf]

A.

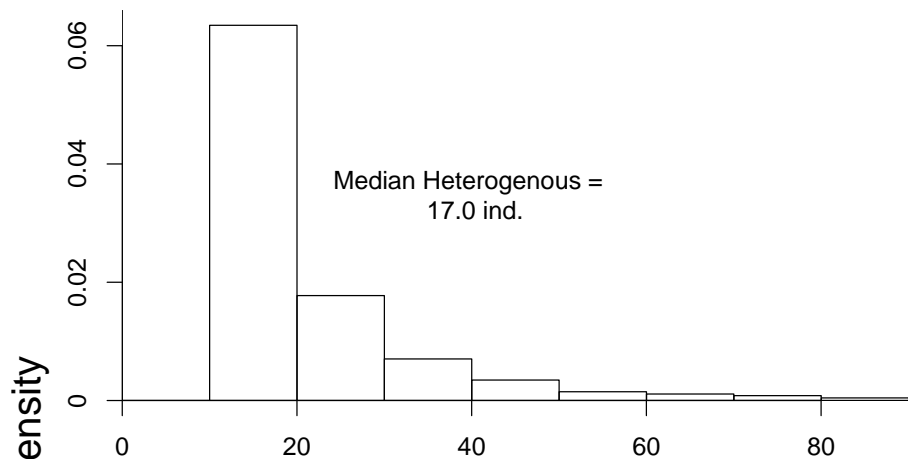

B.

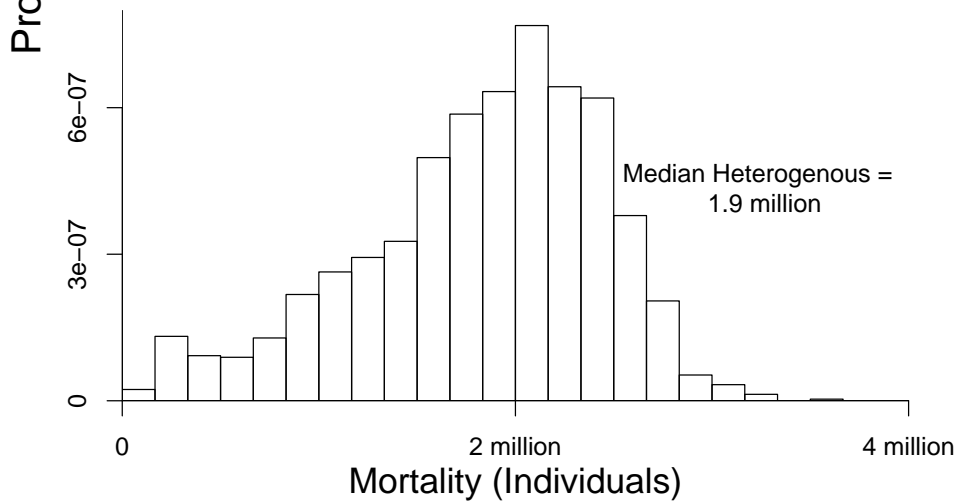

Supplement: pnas_0600816103_13.pdf [file pnas_0600816103_13.pdf]

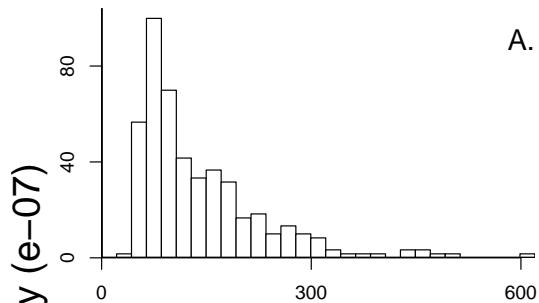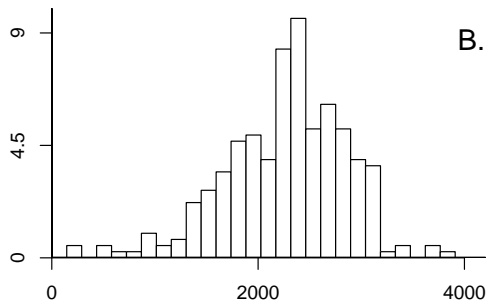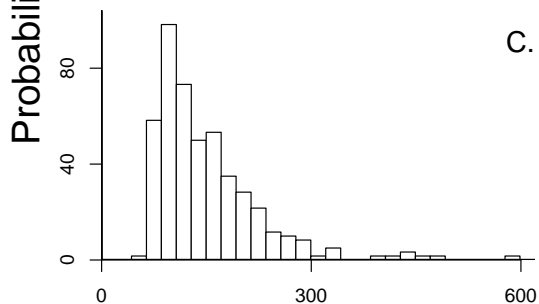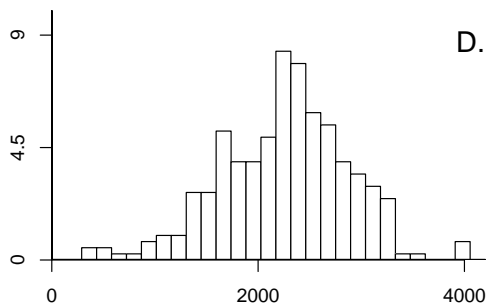

Trace minus Mass (Thousands)

Supplement: pnas_0600816103_2.pdf [file pnas_0600816103_2.pdf]

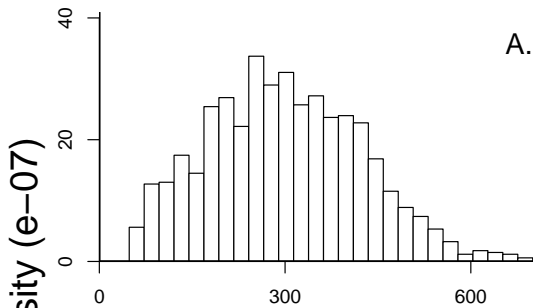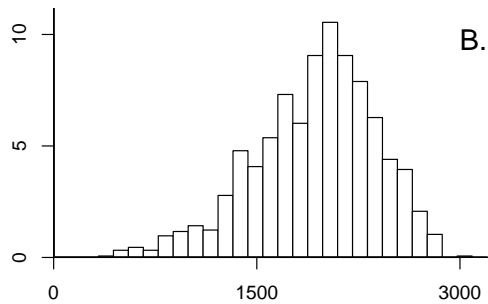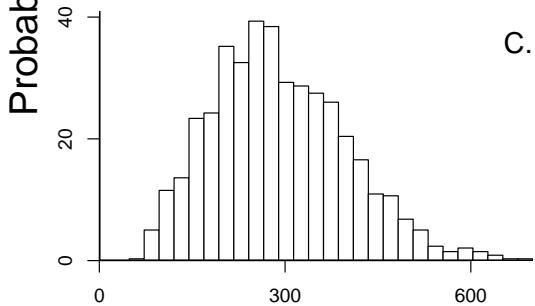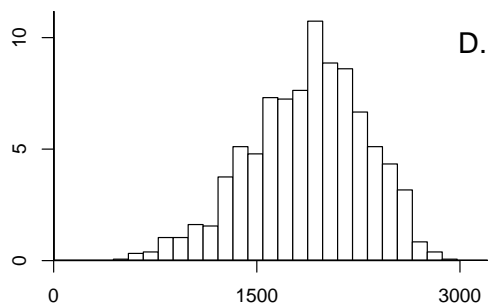

Trace minus Mass (Thousands)

Supplement: pnas_0600816103_3.pdf [file pnas_0600816103_3.pdf]

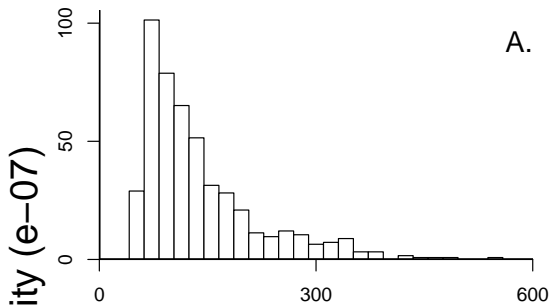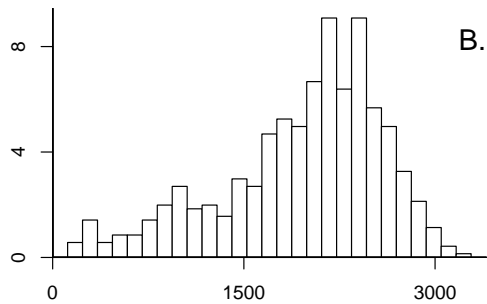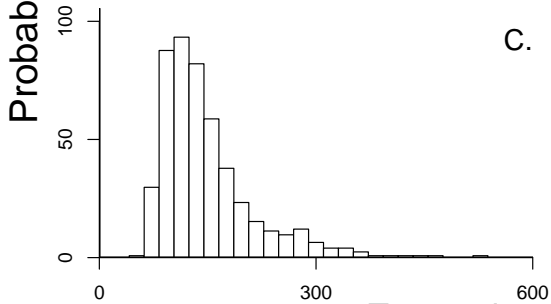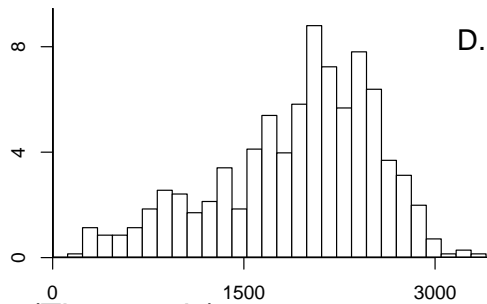

Trace minus Mass (Thousands)

Supplement: pnas_0600816103_4.pdf [file pnas_0600816103_4.pdf]

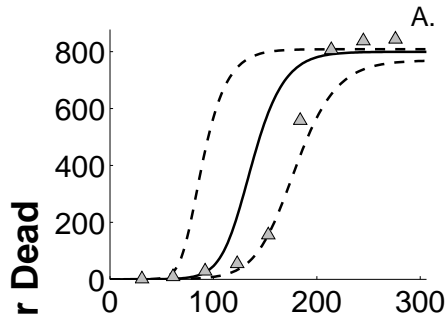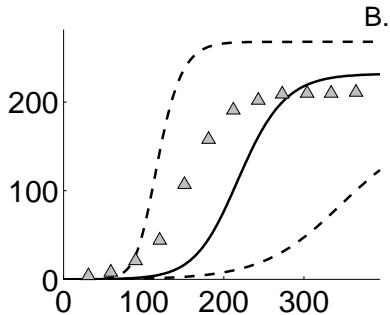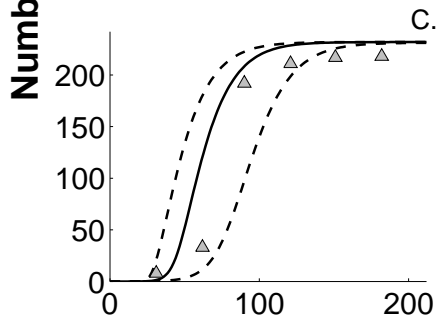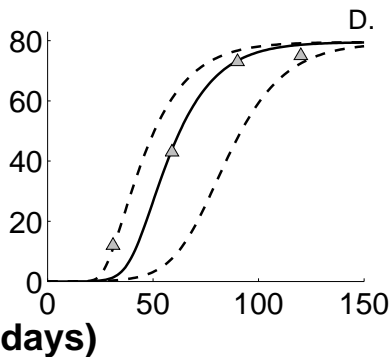

Supplement: pnas_0600816103_5.pdf [file pnas_0600816103_5.pdf]

A.

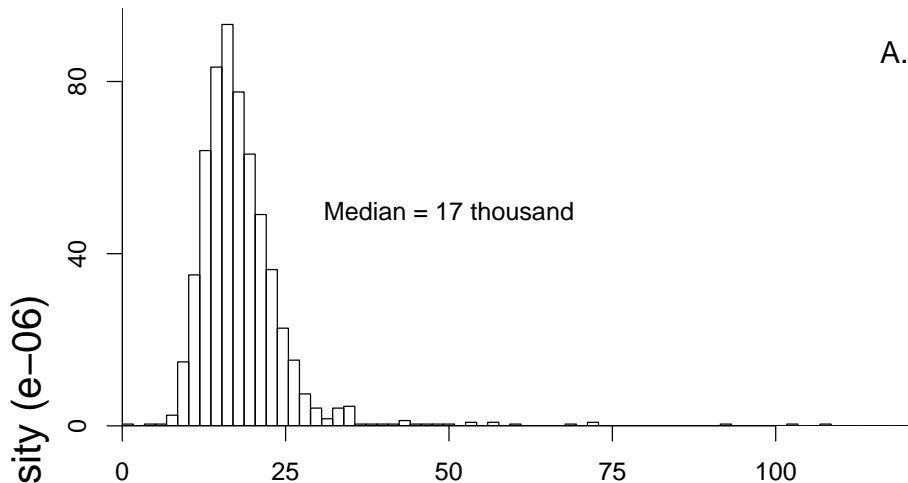

B.

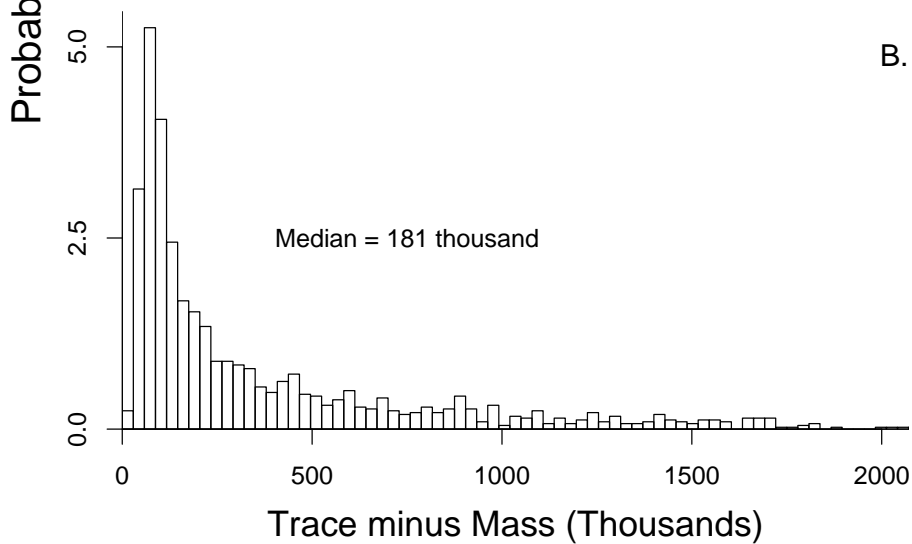

Supplement: pnas_0600816103_6.pdf [file pnas_0600816103_6.pdf]

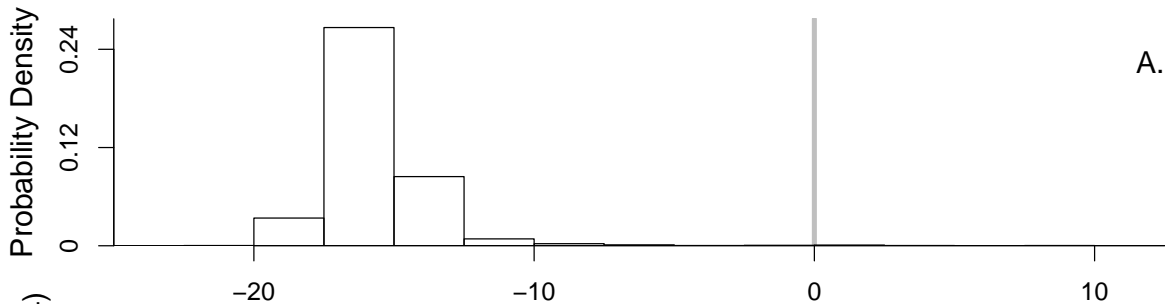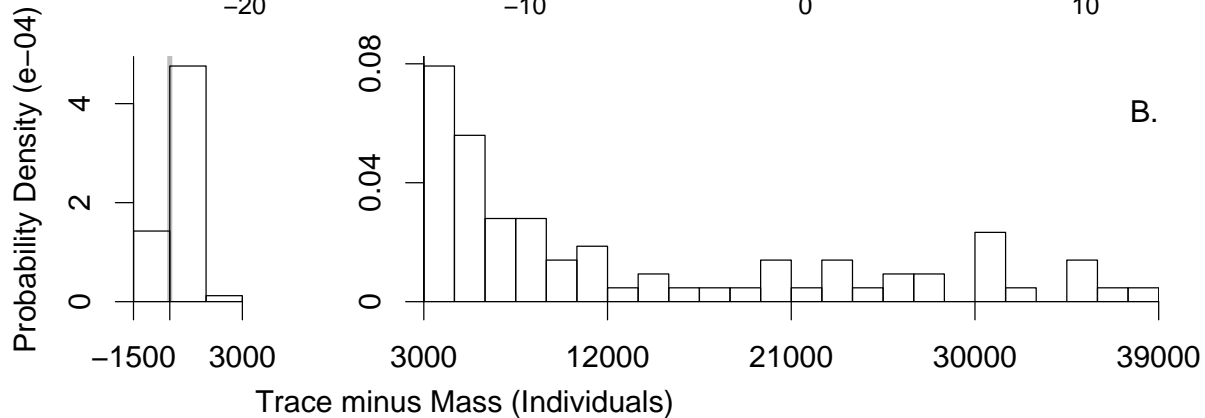

Supplement: pnas_0600816103_7.pdf [file pnas_0600816103_7.pdf]

A.

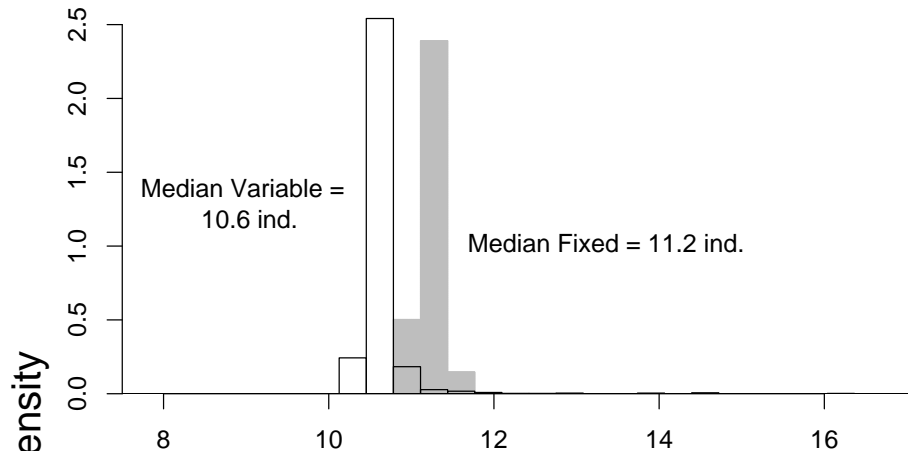

B.

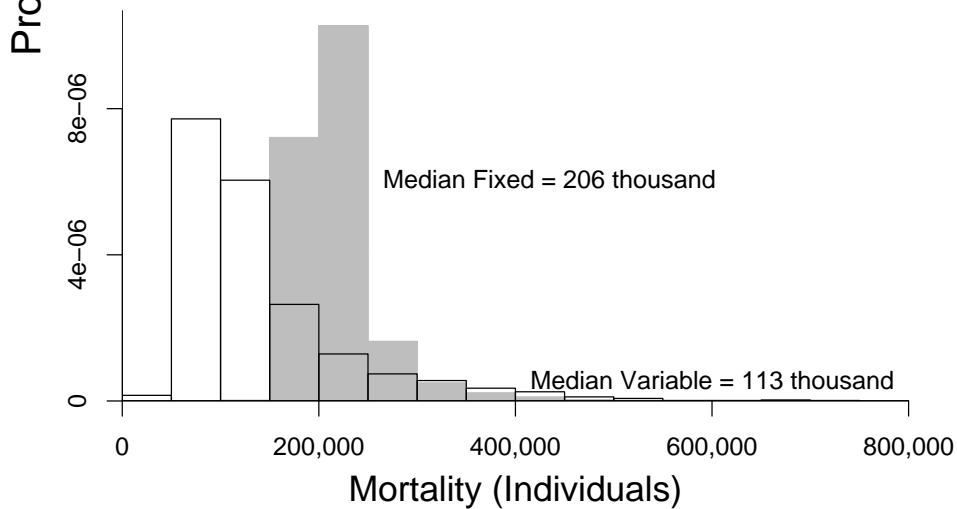

Supplement: pnas_0600816103_8.pdf [file pnas_0600816103_8.pdf]

A.

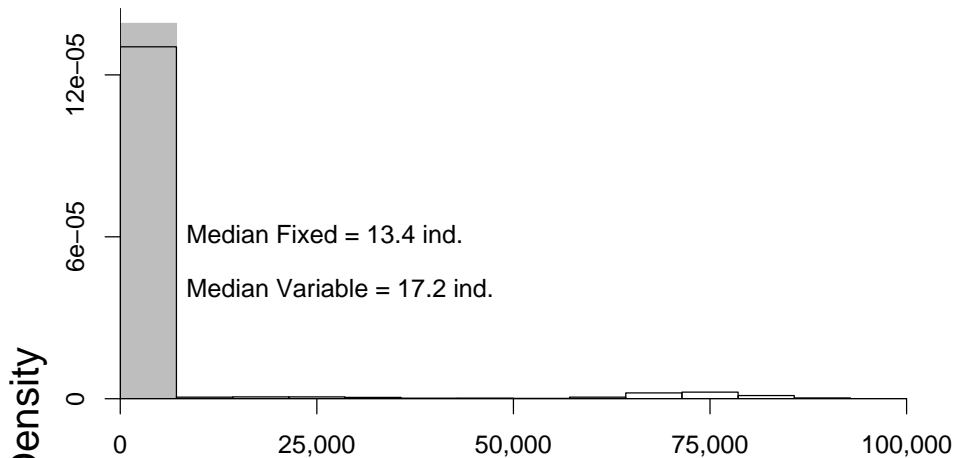

B.

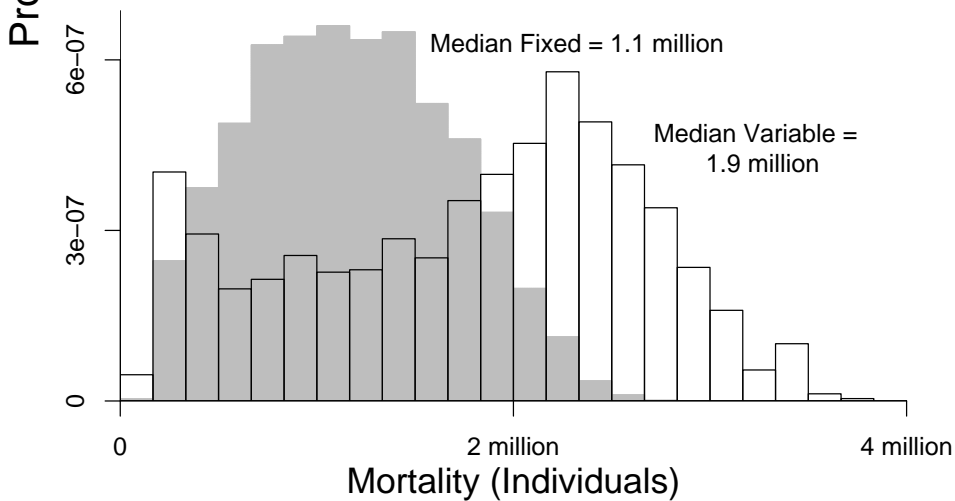

Supplement: pnas_0600816103_9.pdf [file pnas_0600816103_9.pdf]
